# Supplementary material for: Functionally related transcripts have common RNA motifs for specific RNA-binding proteins in trypanosomes
Source: PubMed Central journal article supplement (PMC2637893; doi:10.1186/1471-2199-9-107), 2008-12-08

# A

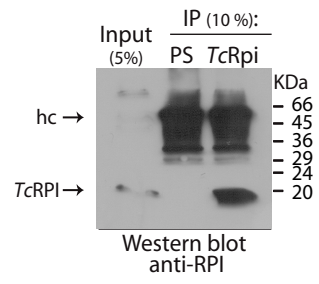

# B

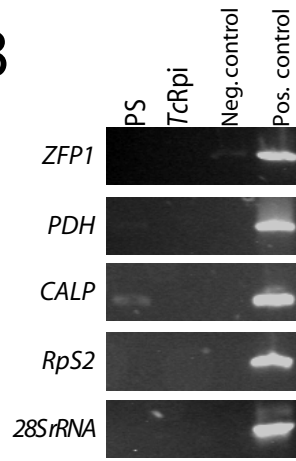

Supplement: 1471-2199-9-107-S1.pdf [file 1471-2199-9-107-S1.pdf]
